1 March 24, 2021

2 **The Degree of Polymerization and Sulfation Patterns in Heparan Sulfate are**  
3 **Critical Determinants of Cytomegalovirus Entry into Host Cells**

4

5 Mohammad H. Hasan<sup>1#</sup>, Dipanwita Mitra<sup>1#</sup>, Rinkuben C. Parmar<sup>1</sup>, Lauren A. Fassero, Quntao  
6 Liang<sup>2,6</sup>, Hong Qiu<sup>3</sup>, Vaibhav Tiwari<sup>4</sup>, Joshua S. Sharp<sup>2</sup>, Lianchun Wang<sup>5</sup> and Ritesh Tandon<sup>1\*</sup>

7

8 <sup>1</sup>Department of Microbiology and Immunology, University of Mississippi Medical Center, 2500  
9 North State Street, Jackson, MS 39216, USA. <sup>2</sup>Department of Biomolecular Sciences, School of  
10 Pharmacy, University of Mississippi, Oxford, MS 38677, USA. <sup>3</sup>Complex Carbohydrate  
11 Research Center, University of Georgia, Athens, GA 30602. <sup>4</sup>Department of Microbiology and  
12 Immunology, Midwestern University, Downers Grove, IL, 60515, USA. <sup>5</sup>Department of Molecular  
13 Pharmacology and Physiology, University of South Florida, Tampa, FL 33612, USA. <sup>6</sup>College of  
14 Biological Science and Engineering, University of Fuzhou, Fujian, 350108, China.

15

16 **#Equal contributions**

17 **\*Corresponding Author:** Ritesh Tandon

18 Phone: 601-984-1705, Fax: 601-984-1708, Email: [rtandon@umc.edu](mailto:rtandon@umc.edu)

19

20 **Keywords:** CMV, herpesviruses, heparan sulfate, sulfation

21 **Running title:** HS as CMV attachment receptors

## 22 **ABSTRACT**

23 Several enveloped viruses, including herpesviruses attach to host cells by initially  
24 interacting with cell surface heparan sulfate (HS) proteoglycans followed by specific  
25 coreceptor engagement which culminates in virus-host membrane fusion and virus  
26 entry. Interfering with HS-herpesvirus interactions has long been known to result in  
27 significant reduction in virus infectivity indicating that HS play important roles in initiating  
28 virus entry. In this study, we provide a series of evidence to prove that specific  
29 sulfations as well as the degree of polymerization (*dp*) of HS govern human  
30 cytomegalovirus (CMV) binding and infection. First, purified CMV extracellular virions  
31 preferentially bind to sulfated longer chain HS on a glycoarray compared to a variety of  
32 unsulfated glycosaminoglycans including unsulfated shorter chain HS. Second, the  
33 fraction of glycosaminoglycans (GAG) displaying higher *dp* and sulfation has a larger  
34 impact on CMV titers compared to other fractions. Third, cell lines deficient in specific  
35 glucosaminyl sulfotransferases produce significantly reduced CMV titers compared to  
36 wild-type cells and virus entry is compromised in these mutant cells. Finally, cells  
37 pretreated with a peptide that specifically binds sulfated-HS produce significantly  
38 reduced virus titers compared to the control peptide treated cells. Taken together, these  
39 results highlight the significance of HS chain length and sulfation patterns in CMV  
40 attachment and infectivity.

41 **IMPORTANCE**

42 Heparan sulfate (HS) is a linear polysaccharide found in all animal tissues. It binds to a  
43 variety of protein ligands, including cytokines, chemokines, growth factors and  
44 morphogens and regulates a wide range of biological activities, including developmental  
45 processes, angiogenesis, blood coagulation, and tumor metastasis. The molecular  
46 diversity in HS chains generates unique binding sites for specific ligands and can offer  
47 preferential binding for a specific virus over other viruses or cellular ligands. In the  
48 current study human cytomegalovirus (CMV) was found to bind preferentially to  
49 uniquely sulfated and polymerized HS. The HS mimics designed with these properties  
50 inhibited CMV infection. The results were corroborated by parallel studies in mutant  
51 mouse cells as well as using peptide inhibition. Combined together, the data suggests  
52 that CMV preferentially attaches to uniquely modified HS and thus this virus-host  
53 interaction is amenable to targeting by specifically designed HS mimics or peptides.

## 54 **INTRODUCTION**

55 The heparan sulfate (HS) proteoglycans are present on most cell types and function  
56 as cellular attachment receptors for medically important viruses, including human  
57 immunodeficiency virus (HIV), hepatitis-C virus (HCV), human papillomavirus (HPV),  
58 Dengue virus (DENV) and the recently emerged SARS-CoV-2 (1, 2) (3-6). In addition,  
59 virtually all human herpesviruses, with the possible exception of Epstein Barr virus, use  
60 HS as an initial co-receptor for entry (7). The interaction between cell surface HS and  
61 virus envelope is the initial event in the complex process of virus entry. A successful  
62 virus entry involves downstream co-receptor interactions ultimately leading to fusion  
63 between the virus envelope and the cell membrane (8).

64 Herpesviruses and several other enveloped viruses enter the host cells using two  
65 distinct pathways: 1) A pH-independent pathway which involves the fusion of the virus  
66 envelope with the plasma membrane; and 2) A pH-dependent pathway that involves  
67 endocytosis of the virus particle (9). In cells, where binding of virus to cell surface  
68 receptors induces endocytosis, the usual consequence is the acidification of the  
69 endosome, which ultimately triggers fusion between the virus envelope and endosomal  
70 membrane (7). Interestingly, human cytomegalovirus (HCMV) entry follows direct fusion  
71 at the cell surface in fibroblasts, while entry into other relevant cell types, such as  
72 endothelial cells, follows an endocytic route (10, 11). Different virus glycoprotein  
73 complexes are involved in each case; however, HS functions as the primary attachment  
74 receptor. Moreover, the presence of HS receptors are well documented in endosomal  
75 membranes and HS receptors likely play roles in intracellular virus trafficking (12-15).

76 The herpesvirus envelope is a lipid bilayer derived from host cell membranes in which  
77 most cellular proteins have been displaced by viral membrane proteins. For HCMV, at  
78 least twenty three different viral glycoproteins have been found to be associated with  
79 purified virion preparations (16). For most herpesviruses, the conserved glycoprotein B  
80 (gB) is required for virus entry and binds to cell surface molecules, including HS, which  
81 is present not only as a constituent of cell surface proteoglycans but also as a  
82 component of the extracellular matrix and basement membranes in organized tissues  
83 (7, 17). HCMV gB binds to HS resulting in virus attachment (18) similar to its  
84 counterparts in herpes simplex virus (HSV)-1 (17, 19) and varicella-zoster virus (VZV)  
85 (20). Subsequently, HCMV gB binds to cellular protein receptors such as EGFR (21),  
86 PDGF $\alpha$  (22), and integrins (23, 24), which culminates in virus entry. Treatment of cells  
87 with soluble form of gB inhibits HCMV entry (25). HCMV binding and infection are  
88 reduced by soluble heparin and HS, as well as in cells treated with heparinases or those  
89 unable to produce HS (26). A better structural understanding of these inhibitions will  
90 pave the way to design effective antivirals that are highly specific as well as more  
91 effective.

92 The synthesis of HS is a complex process involving multiple specialized enzymes  
93 and is initiated from a tetrasaccharide (GlcA-Gal-Gal-Xyl) that is attached to the core  
94 protein (Fig. 1A). HS polymerase is responsible for building the polysaccharide  
95 backbone with a repeating unit of -GlcA-GlcNAc- (Fig. 1B). The backbone is then  
96 modified by N-deacetylase/N-sulfotransferase (NDST) responsible for N-deacetylation  
97 and N-sulfation of selected glucosamine residues, C5-epimerase responsible for  
98 epimerization of selected glucuronic moieties to iduronic acid, 2-O-sulfotransferase

99 (Hs2st; 2-O-ST) responsible for 2-O-sulfation of selected iduronic acid residues, 6-O-  
100 sulfotransferase (H6st; 6-O-ST) for 6-O-sulfation and finally (but rarely) 3-O-  
101 sulfotransferases (Hs3st; 3-O-ST) responsible for 3-O-sulfation (27, 28). The substrate  
102 specificities of these biosynthetic enzymes dictate the structures of HS products,  
103 including sulfation levels, the contents of L-iduronic acid (IdoA) units and the size of the  
104 polysaccharides (27). The location of the sulfo groups and IdoA in turn play a crucial  
105 role in determining the binding and functions of HS.

106 In the current study, we investigated the impact of specific sulfations as well as  
107 degree of polymerization in terms of numbers of monosaccharide units (*dp*) in HS chain  
108 on both human and mouse CMV infection and binding. Purified CMV extracellular  
109 virions preferentially bound strongly to the longer sulfated HS chains but not to the  
110 shorter unsulfated HS chains on a glycoarray. Glycosaminoglycans of different *dp* were  
111 derivatized from enoxaparin (a low molecular weight heparin) and tested for their ability  
112 to inhibit CMV infection in cell culture. The results show that longer glycan chains are  
113 more efficient at reducing CMV titers in cells compared to shorter chain glycans. Also,  
114 the cell lines defective in expression of various sulfotransferases showed significantly  
115 reduced CMV entry and replication. Finally, cells pre-treated with peptides that bind HS  
116 and 3-O-S HS (29-32) significantly reduced HCMV titers compared to a control peptide.  
117 Overall, these results indicate that CMV binding to cell surface glycans is dependent on  
118 branch length and sulfation pattern of HS.

119

## 120 **MATERIALS AND METHODS**

121 **Preparation of glycosaminoglycans (GAGs) oligosaccharides.** Glycosaminoglycans  
122 of different *dp* were fractionated from enoxaparin (a low molecular weight heparin) by  
123 Bio-Gel P-10 chromatography as previously described (33). Briefly, 15 mg/mL  
124 enoxaparin sodium derived from porcine intestinal mucosa (Sanofi-Aventis U.S.,  
125 Bridgewater, NJ) was applied to a Bio-Gel P-10 column (2.5X120 cm, Bio-Rad,  
126 Hercules CA) and eluted with 0.2 M NH<sub>4</sub>HCO<sub>3</sub> at a flow rate of 14 ml/h. Elution of  
127 oligosaccharides was monitored by absorbance at 232 nm. NH<sub>4</sub>HCO<sub>3</sub> was removed by  
128 heating in oven at 50 °C for 24 h.

129

130 **Preparation of the 6-O desulfated Arixtra with MTSTFA.** A detailed procedure on the  
131 preparation of 6-O desulfated Arixtra was published previously (34). Briefly, 4 mg of  
132 Arixtra was added to 10 volumes (w/w) of N-Methy-N-(trimethylsilyl)-trifluoroacetamide  
133 (MTSTFA, Sigma, ≥98.5%) and 100 volumes (v/w) of pyridine. The mixture was heated  
134 at 100 °C for 30 min, then quickly cooled in an ice-bath, followed by extensive dialysis  
135 and freeze-drying. The sample was resuspended in 50% acetonitrile/water at a  
136 concentration of 30 μM for later LC-MS/MS analysis.

137

138 **LC-MS/MS analysis.** The 6-O-desulfated Arixtra (30 μM) was analyzed on a Thermo  
139 Orbitrap Fusion Tribrid (Thermo Fisher Scientific) coupled with an Ultimate 3000 Nano  
140 LC system (Dionex) using direct infusion. The flow rate was set to 1 μl/min. Mobile-  
141 phase was 50% acetonitrile. Nanoelectrospray voltage was set to 2.0 kV in negative ion  
142 mode. Full MS scan range was set to 200-2000 m/z at a resolution of 60,000, RF lens

143 was 6%, and the automatic gain control (AGC) target was set to  $2.0 \times 10^5$ . For the  
144 MS/MS scans, the resolution was set to 50,000, the precursor isolation width was 3 m/z  
145 units, and ions were fragmented by collision-induced dissociation (CID) at a normalized  
146 collision energy of 80%.

147

148 **Cells.** Mouse embryonic fibroblasts (MEF) and human foreskin fibroblasts (HFF) were  
149 cultured in Dulbecco's modified Eagle's medium (DMEM, Cellgro, Manassas, VA)  
150 containing 4.5 g/ml glucose, 10% fetal bovine serum (SAFC, Lenexa, KS), 1 mM  
151 sodium pyruvate, 2 mM L-glutamine, and 100 U/ml penicillin-streptomycin (Cellgro,  
152 Manassas, VA) at 37 °C with 5% CO<sub>2</sub>. Mouse lung endothelial cells (WT, H3st1<sup>-/-</sup>,  
153 H3st4<sup>-/-</sup>, H3st1/4-double-knockout, H6st1<sup>-/-</sup>, H6st2<sup>-/-</sup>, and H6st1/2 double-knockout) were  
154 obtained from Wang laboratory at University of South Florida and maintained as  
155 described earlier (35).

156

157 **Virus.** MCMV (strain K181) was grown in MEF cells, while HCMV (Towne strain) was  
158 grown on HFF cells. Virus stock was prepared in 3X autoclaved milk, sonicated 3 times  
159 and stored at -80 °C. 3X autoclaved milk is prepared from Carnation (Nestle) instant  
160 nonfat dry milk powder. 10% milk was prepared in nano pure water, pH was adjusted to  
161 7.0 and was autoclaved for 3 times. During infection, media was removed from the wells  
162 of cell culture plates and appropriately diluted virus stock was absorbed onto the cells in  
163 DMEM without serum. Cells were incubated for 1 hour with gentle shaking every 10  
164 mins followed by washing 3X with PBS. Fresh complete medium was added and cells



165 were incubated until the end point. For extracellular virus (ECV) purification, HFF were  
166 seeded in roller bottles, grown to confluency and infected with HCMV (Towne strain) at  
167 MOI of 0.01. Two days after 100% cytopathic effect was observed, infected cell medium  
168 was collected and centrifuged at low speed to pellet cellular debris, and the supernatant  
169 was transferred to new tubes and centrifuged at 20,000 g for 1 hour to pellet the ECV.  
170 This ECV pellet was re-suspended in phosphate buffer, sonicated to eliminate any  
171 aggregates, loaded over 15-50% continuous sucrose gradients and centrifuged in a  
172 SW-41 rotor at 39,000 RPM for 20 min. ECV bands were visualized in incandescent  
173 light and harvested by puncturing the sides of the centrifuge tubes. These bands were  
174 washed once with phosphate buffer, spun again and the final pellet resuspended in low  
175 salt phosphate buffer. An aliquot of the sample was used for assessment of initial  
176 quality of ECV by negative staining and transmission electron microscopy. Purified ECV  
177 were shipped on ice to Z biotech (Aurora, CO) for glycoarray binding analysis.

178

179 **Cell viability assay.** HFF cells plated in 12 well tissue culture plates were grown to  
180 confluency and pretreated for 1h with 10  $\mu$ M concentration of candidate HS and then  
181 infected with HCMV (Towne strain) at a multiplicity of infection (MOI) of 3.0 or mock-  
182 infected in the presence of candidate HS . Five hundred  $\mu$ l of fresh complete medium  
183 containing HS was added to the wells on day 3 and day 6. At the designated time  
184 points, media was removed and cells were harvested by trypsinization. Cell viability was  
185 determined using trypan blue exclusion on TC20 automated cell counter (BioRad  
186 Laboratories, Hercules, CA) following manufacturer's protocol.

187

188 **Virus titers.** Infected or mock-infected samples were harvested within the medium at  
189 the designated end points and stored at  $-80^{\circ}\text{C}$  before titration. In some experiments,  
190 media and cells were separated by low-speed ( $< 1000 \times g$ ) centrifugation and viral  
191 loads in supernatant and cells were quantified by titering on wild-type cells. Titers were  
192 performed as described earlier (36) with some modifications. In brief, monolayers of  
193 fibroblasts grown in 12 well plates and serial dilutions of sonicated samples were  
194 absorbed onto them for 1 h, followed by 3X washing with PBS. Carboxymethylcellulose  
195 (CMC) (Catalog No. 217274, EMD Millipore Corp., Billerica, MA) overlay with complete  
196 DMEM media (1-part autoclaved CMC and 3 parts media) was added and cells were  
197 incubated for 5 days. At the end point, overlay was removed and cells were washed 2X  
198 with PBS. Infected monolayers were fixed in 100% methanol for 7 min, washed once  
199 with PBS and stained with 1% crystal violet (Catalog No. C581-25, Fisher Chemicals,  
200 Fair Lawn, NJ) for 15 min. Plates were finally washed with tap water, air dried and  
201 plaques with clear zone were quantified.

202

203 **Immunoblots.** Mouse lung endothelial cells (WT, H3st1<sup>-/-</sup>, H3st4<sup>-/-</sup>, H3st1/4-double-  
204 knockout, H6st1<sup>-/-</sup>, H6st2<sup>-/-</sup>, and H6st1/2 double-knockout) were infected with MCMV  
205 (K181 strain) and an MOI of 3.0 and the whole cell lysates were harvested at 2 hours  
206 post infection for analysis. The blot was probed with anti -IE1 antibody (catalog no. HR-  
207 MCMV-12, Center for Proteomics, University of Rijeka, Croatia) and HRP-conjugated  
208 goat anti mouse antibody (PI131444, Invitrogen) was used as the secondary antibody.

209

210 **Glycoarrays.** A dilution series of purified HCMV virions were incubated on two different  
211 custom glycoarrays (Table 1 and Table 2, Z-Biotech) using established protocols (37)  
212 and the arrays were analyzed to assess specific virus binding. Briefly,  $10^5$  to  $10^8$  pfu/ml  
213 of purified virions were incubated for an hour on glycoarrays containing six replicates of  
214 each glycosaminoglycan. After incubation, staining with primary antibody (mouse anti  
215 gB (clone 2F12, Virusys Inc, Taneytown, MD) was done at 100  $\mu$ g/ml and secondary  
216 antibody (Goat anti mouse IgG AlexaFlour555) was done at 1 $\mu$ g/ml. Maximum strength  
217 fluorescent signal was obtained for  $10^8$  pfu/ml concentration of the virus, therefore, only  
218 this concentration is represented in the final data obtained for plotting the graphs.

219

220 **Treatment of HFF cells with anti-HS and anti-3-O-S HS peptides.** HFF cells were  
221 pre-treated with the phage display derived peptides (1 mg/ml) generated against wild-  
222 type HS (LRSRTKIIRIRH), and 3-O-S HS (MPRRRRIRRRQK) (29) that bind specifically  
223 to HS and 3-O-S HS respectively, or left mock treated for 4 hours before the cells were  
224 infected with  $\beta$ -galactosidase expressing CMV (ATCC) for 9 days.  $\beta$ -Galactosidase  
225 assay was performed using X-gal (Sigma). The effect of entry- blocking activity of  
226 peptide was examined by counting number of virus foci.

227

228 **Statistics:** Student's t-tests were conducted in Graphpad Prism comparing the means  
229 of different groups (GraphPad Prism version 8.0.0, GraphPad Software, San Diego,  
230 California USA, [www.graphpad.com](http://www.graphpad.com)). Standard error of mean was plotted as error bars.  
231 A p value of <0.05 was considered significant.

## 232 RESULTS

### 233 Purified HCMV extracellular virions preferentially bind to sulfated 234 glycosaminoglycans with increased degree of polymerization.

235 First, we sought to establish the category of GAG that preferentially binds to purified  
236 HCMV virions. HCMV extracellular virions were purified as described above and  
237 incubated with custom glycoarrays containing increasing molecular weight species of  
238 hyaluronic acid, heparin, chondroitin sulfate, and dermatan sulfate (Table 1). HCMV  
239 binding to non-sulfated hyaluronic acid (HA10 to HA20 and HA93 polymer) was  
240 negligible but significant binding to all heparin species was detected with a trend of  
241 increased binding to heparins as their *dp* increased (Fig. 2). HCMV also bound to large  
242 size chondroitin sulfate D (GAG28, *dp*20), and dermatan sulfate oligosaccharides  
243 (GAG32- GAG34, *dp*16-*dp*20) but not to chondroitin sulfate AC (GAG17- GAG22). It is  
244 important to note that while the chondroitin sulfate A (CS-A) is sulfated at C4 of the  
245 GalNAc, and the chondroitin sulfate C (CS-C) is sulfated at the C6 of the GalNAc only,  
246 the chondroitin sulfate D is sulfated at C2 of the glucuronic acid as well as the C6 of the  
247 GalNAc sugar and hence has double the amount of sulfation compared to CS-A and  
248 CS-C. Dermatan sulfate (DS), formerly referred to as CS-B, is formed from the polymer  
249 backbone of chondroitin sulfate by the action of chondroitin-glucuronate C5 epimerase,  
250 which epimerizes individual d-glucuronic acid residues to l-iduronic acid. The binding  
251 affinity to DS was also size-dependent increasing from GAG32- GAG34 (*dp*16- *dp*20).  
252 Heparin (*dp*30) was the best HCMV binder in this assay. The virus preparation does not  
253 contain streptavidin label and thus positive control 1 (PC1) serves as a negative rather  
254 than a positive control.

255 On a second HS specific array (Table 2), HCMV showed strong binding to the  
256 HS with longer monosaccharide chains (HS007 to HS024) and minimal binding to  
257 unsulfated glycans (HS001-HS006) (Fig. 3). The maximum binding was observed for  
258 HS014, HS015 and HS016, which are all 6-O-S 9-mers with moderate amount of  
259 sulfation (1.3-1.8 sulfate group per disaccharide). Also, significant amount of binding  
260 was observed for 2-O-S (HS17-HS19), 6-O-S/2-O-S (HS20-22) and 2-O-S/6-O-S/3-O-S  
261 (HS23-24) HS that had high amount of sulfation (1.3-2.7 sulfate group per disaccharide)  
262 and 6-8 disaccharides per chain. Overall the data from these experiments indicate that  
263 the *dp* of HS as well as sulfation is important for HCMV binding.

264

#### 265 **The degree of polymerization of GAG chains impacts CMV infectivity.**

266 Glycosaminoglycans of different *dp* were fractionated from enoxaparin (a low molecular  
267 weight heparin). All of these GAGs are based on a HS backbone and differ in either *dp*  
268 or degree/place of sulfation or both (Fig. 4, S1). These GAGs, along with heparin and  
269 Arixtra (fondaparinux sodium), were first screened in a GFP-based preliminary virus  
270 focus reduction assay using GFP tagged HCMV (Towne strain). The viral GFP  
271 expression was most efficiently reduced by heparin salt (PIHSS; Heparin sodium salt  
272 from porcine intestinal mucosa) whereas Arixtra, 6-O-desulfated Arixtra and enoxaparin  
273 had little to no impact on GFP expression (Fig. 4). In general, enoxaparin derived GAGs  
274 with higher *dp* were more efficient in reducing viral GFP compared to low *dp* derivatives.  
275 To follow up on this primary GFP based screening, we performed viral titer assay using  
276 HCMV (Towne strain) that measures total virus yields at 5 days post-infection. Most  
277 reduction in viral titers was observed for heparin (PIHSS) followed by enoxaparin

278 derivative with  $>20$   $dp$  (Fig. 5A). Plotting of viral titer reduction as a function of  $dp$   
279 revealed a general trend where higher  $dp$  derivatives lead to higher reduction in viral  
280 titers (Fig. 5B). Thus, this experiment indicated that longer HS chains are more efficient  
281 at reducing HCMV titers in cells. To investigate whether this inhibitory effect was due to  
282 an increase in the number of HCMV binding sites per chain of longer chain GAGs  
283 towards virus particles, the experiments were repeated at 0.05 g/L concentrations of  
284 GAGs instead of the previously used molar equivalent concentrations (Fig. 6A). As  
285 micromolar concentration (10  $\mu$ M) of GAGs is based on number of molecules provided,  
286 GAGs consisting of longer chain will have more potential binding sites for virus than  
287 those of shorter chains. The other concentration (0.05 g/L) is based on weight; thus this  
288 concentration normalizes the number of potential virus binding sites for GAGs  
289 consisting of both long and short chains. Interestingly, similar trend of inhibitory results  
290 leaning towards efficacy of higher  $dp$  against HCMV infection were obtained at 0.05 g/L  
291 indicating that this effect is not merely due to a higher number of potential independent  
292 binding sites in the longer GAG chains and instead involves a difference in the  
293 molecular interaction between HCMV and the longer GAG chains. A line graph for each  
294 concentration of GAGs was generated that demonstrates the relationship of viral titer  
295 and degree of polymerization (Fig. 6B). Although GAG treatment is not known to induce  
296 cell death, to rule out that these effects on virus titers could be attributed to the health of  
297 cells, we performed cell viability assays in both uninfected and infected settings. Cell  
298 viability was not affected at the treated concentrations of any of our test GAGs (Fig. 7A).  
299 Moreover, heparin (PIHSS) and enoxaparin derivatives ( $dp$  12 or greater) efficiently  
300 protected cells from virus induced lytic death (Fig. 7B). These results corroborate the

301 results of our glycoarray experiments that showed that GAG with higher *dp* have higher  
302 CMV binding compared to GAG with lower *dp* (Fig. 3).

303

304 **Cell lines defective in expression of specific sulfation enzymes have reduced CMV titers**  
305 **and reduced virus entry.**

306 Due to species specificity of HCMV, animal models are frequently used to study CMV  
307 pathogenesis (38, 39). Studies of murine CMV (MCMV) infections of mice have served  
308 a major role as a model of CMV biology and pathogenesis (40). Lung endothelial cell  
309 lines from adult mice were mutated for specific sulfotransferase enzymes by a CRISPR-  
310 Cas9 based gene editing system (35, 41, 42). Since previous studies showed that 3-O-  
311 S HS is important for HCMV entry in human iris stromal cells (43), we analyzed virus  
312 replication in Hs3st1 and Hs3st4 (Glucosaminyl 3-O-sulfotransferase 1 and 4,  
313 respectively) knockout cell lines as well as the Hs3st1/4 double knockout cell line. At  
314 high (5.0) as well as low (0.01) multiplicity of infection (MOI), MCMV growth was  
315 significantly reduced in the single Hs3st1 and Hs3st4 knockouts as well as in the double  
316 Hs3st1/4 knockouts, indicating that 3-O-sulfation of HS is important for HCMV infection  
317 (Fig. 8). Further, we probed whether virus entry is impacted in the cells knocked out for  
318 different combinations of these sulfotransferases. Expression of viral immediate early  
319 protein (IE1) has been used as a surrogate for virus entry since it's one of the earliest  
320 events after a successful virus entry (44-46). Results of an immunoblot probing for IE1  
321 show that virus entry is significantly impacted in H3st1<sup>-/-</sup>, H3st4<sup>-/-</sup>, H3st1/4-double-  
322 knockout, H6st1<sup>-/-</sup>, H6st2<sup>-/-</sup>, and H6st1/2 double-knockout cells, compared to the wild-

323 type cells (Fig. 9A and B). The H6st1<sup>-/-</sup>, H6st2<sup>-/-</sup> and H3st4<sup>-/-</sup> mutants showed the most  
324 impact on MCMV entry.

325

### 326 **Peptides generated against HS and 3-O-S HS block HCMV infection.**

327 In order to examine the effect of sulfated HS on HCMV infection, we utilized phage  
328 display derived anti-HS and anti-3-O-S HS peptide (29). These peptides bind  
329 specifically to cellular HS and 3-O-S HS respectively, and have been shown to block  
330 binding of HSV-1. The HFF cells were pre-treated with either the anti-HS peptide or the  
331 anti-3-O-S HS peptide and the mock-treated cells were used as control. As indicated in  
332 Fig. 10, the anti-3-O-S HS peptide treatment resulted in a significant reduction of HCMV  
333 foci in HFF cells compared to an anti-HS peptide or the mock-treated cells. The fact that  
334 anti-3-O-S HS peptide was much more effective at reducing HCMV foci compared to an  
335 anti-HS peptide indicates that this effect is governed by HS structure and not only by the  
336 peptide charge.

337

## 338 **DISCUSSION**

339 In this study, we utilized multiple approaches, including glycoarray binding analysis, HS  
340 mimics, HS mutant cell lines, and anti-HS/3-O-S HS peptides to demonstrate that  
341 specifically sulfated HS with higher degree of polymerization affect CMV infection and  
342 binding. The results significantly advance the age-old knowledge of HS binding to  
343 herpesviruses by illustrating the importance of HS structural modifications in CMV  
344 binding and infection. We first screened several sulfated or unsulfated GAGs with



345 complex sugar structure to investigate which GAGs are more efficient at binding to  
346 HCMV virions. This glycoarray analysis indicated that HCMV bound heparins with  
347 strong affinity and showed increased affinity for longer chain length heparins (Fig. 2). To  
348 further investigate this binding, we utilized another glycoarray consisting of HS of varied  
349 polymerization and sulfation levels. The results from this glycoarray indicated that  
350 HCMV binds strongly with HS having both longer monosaccharide chain and a  
351 moderate level of sulfation (Fig. 3). Thus, sulfated HS with more complex branches and  
352 sulfation patterns preferentially bind to HCMV. Next, we fractionated HS by length (*dp* 2-  
353 20) from enoxaparin and tested their ability to inhibit HCMV growth in cell culture by  
354 competing with HCMV binding. The GFP tagged HCMV was used and the number of  
355 GFP+ foci was quantified in the presence of increasing HS chain length. Amounts of  
356 viral GFP was more effectively reduced when cells were pretreated and maintained with  
357 GAGs having a higher *dp* (Fig. 4). This assay served as a surrogate for a virus entry  
358 assay since the GFP is independently expressed from an early promoter in the virus  
359 genome (47). For a deeper understanding of this reduction, we performed a similar  
360 experiment where HCMV Towne strain was used and viral load was quantified at 5 days  
361 post-infection. Significant reduction in virus titers was observed in samples treated with  
362 higher *dp* of GAG but not with lower *dp* corroborating the results from glycoarray  
363 experiments that chain length of GAG is an important factor in determining HCMV  
364 binding. Also, this effect was not due to a simple increase in the number of potential  
365 HCMV binding sites per mole of GAG, as evidenced by similar trend of inhibition  
366 obtained when treating cells with equivalent  $\mu\text{M}$  or  $\text{g/L}$  concentrations of GAGs.  
367 Treatment of cells with these GAGs did not affect cell viability for the duration of

368 treatment (Fig. 7A) confirming that the observed reduction in virus titer was not due to  
369 the cell death. Moreover, cells pretreated and maintained with GAGs of longer *dp*  
370 resisted infection induced cell death at late time post-infection (Fig. 7B). We also tested  
371 the impact of specific HS sulfation mutants on MCMV infection. As 3-O sulfation has  
372 been reported to be critical for herpesvirus entry (43, 48), we tested MCMV growth in  
373 Hs3st1, Hs3st4 and dual Hs3st1/4 knockout cells. For both high and low MOI, virus titer  
374 was significantly reduced in Hs3st1, Hs3st4 and dual Hs3st1/4 knockout cells (Fig. 8).  
375 Although the differences were statistically significant, we did not see a robust inhibition  
376 of virus titers in these assays and also the double knockout had somewhat less  
377 reduction overall. This could largely be explained by the possible presence of additional  
378 isoforms of Hs3st1 and Hs3st4 in these cells (49). To directly assess the impact of HS  
379 sulfation on virus entry, we used several mutant cell lines deficient in HS sulfation  
380 enzymes. All of these cells were defective in virus entry as assessed by IE1 protein  
381 expression (Fig. 9.). Additional data from anti-3-O-S HS peptide confirmed the  
382 significance of sulfation in HCMV infectivity. The GAG experiments used a fibroblast cell  
383 culture system and a fibroblast tropic strain of HCMV (Towne), whereas MCMV  
384 experiments used lung epithelial cells, thus providing the experimental data from  
385 multiple cell types and two different viruses. While the GFP based assays provide a  
386 surrogate for virus entry assays, the real impact of virus entry inhibitors would be a  
387 reduction in viral titers at the end of infection since an entry inhibitor that only delays  
388 virus entry would be of little translational value. Thus virus yield and titers were used a  
389 measure of effectiveness of GAG inhibitors.

390 The enzymatic modification of HS chains is known to generate unique binding sites for  
391 viral ligands. For example, 3-O-sulfation modification in HS chain generates fusion  
392 receptor for HSV glycoprotein D (gD) promoting viral entry and spread (50). The 3-O-S  
393 HS is a product of enzymatic modification at C3 position of glucosamine residue, which  
394 is relatively rare in comparison to other HS modifications (Fig. 1B). Expression of Hs3st  
395 can make normally resistant Chinese hamster ovary (CHO-K1) cells susceptible to  
396 HSV-1 infection (51). Studies in clinically relevant primary human corneal fibroblasts  
397 have also shown 3-O-S HS as a primary attachment receptor for HSV entry (48).  
398 Interestingly, both HSV-1 and HSV-2 use HS as an attachment receptor but HSV-1  
399 binds to distinct modification sites on HS that HSV-2 is unable to, which could explain  
400 some of the differences in cell tropism exhibited by these two viruses (52). For example,  
401 while N-sulfation and carboxyl groups are required for both HSV-1 and HSV-2 binding,  
402 only HSV-1 is able to bind the specific modification sites generated by 2-O, 6-O, and 3-  
403 O-sulfations (53). The O-desulfated heparins have little or no inhibitory effect on HSV-1  
404 infection but inhibit HSV-2 infection. This susceptibility to O-desulfated heparins can be  
405 transferred to HSV-1 by recombinant transfer of the gene for glycoprotein C (gC-2) from  
406 HSV-2 (53). We reported earlier that 3-O-S HS are important for HCMV entry in human  
407 iris stromal (HIS) cells (43). The expression of Hs3st in HIS cells promoted HCMV  
408 internalization, while pretreatment of HIS cells with heparinase enzyme or treatment  
409 with anti-3-O-S HS (G2) peptide significantly reduced HCMV plaques/foci formation. In  
410 addition, co-culture of the HCMV-infected HIS cells with CHO-K1 cells expressing 3-O-S  
411 HS significantly enhanced cell fusion. A similar trend of enhanced fusion was observed

412 with cells expressing HCMV glycoproteins (gB, gO, and gH-gL) co-cultured with 3-O-S  
413 HS cells. These results highlight the role of 3-O-S HS during HCMV entry.

414 Owing to their inherent structural features, certain sulfated glycans can exert  
415 therapeutic effects against infections caused by pathogenic microorganisms. A study by  
416 Pomin *et al.*, showed that administering sulfated glycans can disrupt the pathogen  
417 protein-host glycosaminoglycan (GAG) complex formation causing impairment of  
418 microbial binding onto host cells (54). Similarly, sulfated GAG, glycosphingolipids and  
419 lectins have been shown to inhibit DENV entry (55). Heparan sulfate mimics, such as  
420 suramin, pentosan polysulfate, and PI-88, SPGG (56, 57) have been reported to be  
421 effective against multiple viruses including herpesviruses (4, 58, 59). The inhibitory  
422 activity of HS mimics, including these compounds, is believed to be due to their  
423 association with GAG binding sites of the putative receptor-binding domain on the viral  
424 protein (4, 60). Thus, HS mimics can inhibit virus adsorption and entry.

425 Overall, the data from these studies indicate that *dp* of GAGs as well as specific  
426 sulfation patterns govern HCMV infection of cells. These studies show the promise of  
427 highly polymerized sulfated-HS as effective anti-CMV agents. Future studies will be  
428 aimed at confirming the CMV glycoproteins that specifically bind to HS on cell surface  
429 and their possible structural illustrations.

430

### 431 **Acknowledgments**

432 The research was supported by NASA (Award #80NSSC19K1603, PI: Tandon) and NIH  
433 (Award R21HL131553, PI: L.W.). QL, JSS and LW acknowledge funding from the

434 National Institute of General Medical Sciences through the Research Resource for  
435 Integrated Glycotechnology (P41GM103390).

436

437 **Author Contributions**

438 RT, JSS, and LW designed the experiments; MHH, DM, LAF, RBP, QL, JSS, VT and

439 RT performed the experiments and analyzed the data. RT and MHH wrote and edited

440 the manuscript.

441 **REFERENCES**

- 442 1. Clausen TM, Sandoval DR, Spliid CB, Pihl J, Perrett HR, Painter CD, Narayanan  
443 A, Majowicz SA, Kwong EM, McVicar RN, Thacker BE, Glass CA, Yang Z,  
444 Torres JL, Golden GJ, Bartels PL, Porell RN, Garretson AF, Laubach L, Feldman  
445 J, Yin X, Pu Y, Hauser BM, Caradonna TM, Kellman BP, Martino C, Gordts P,  
446 Chanda SK, Schmidt AG, Godula K, Leibel SL, Jose J, Corbett KD, Ward AB,  
447 Carlin AF, Esko JD. 2020. SARS-CoV-2 Infection Depends on Cellular Heparan  
448 Sulfate and ACE2. *Cell* 183:1043-1057 e15.
- 449 2. Tandon R, Sharp JS, Zhang F, Pomin VH, Ashpole NM, Mitra D, McCandless  
450 MG, Jin W, Liu H, Sharma P, Linhardt RJ. 2021. Effective Inhibition of SARS-  
451 CoV-2 Entry by Heparin and Enoxaparin Derivatives. *J Virol* 95.
- 452 3. Barth H, Schäfer C, Adah MI, Zhang F, Linhardt RJ, Toyoda H, Kinoshita-Toyoda  
453 A, Toida T, van Kuppevelt TH, Depla E. 2003. Cellular binding of hepatitis C virus  
454 envelope glycoprotein E2 requires cell surface heparan sulfate. *Journal of*  
455 *Biological Chemistry* 278:41003-41012.
- 456 4. Chen Y, Maguire T, Hileman RE, Fromm JR, Esko JD, Linhardt RJ, Marks RM.  
457 1997. Dengue virus infectivity depends on envelope protein binding to target cell  
458 heparan sulfate. *Nature medicine* 3:866.
- 459 5. Giroglou T, Florin L, Schäfer F, Streeck RE, Sapp M. 2001. Human  
460 papillomavirus infection requires cell surface heparan sulfate. *Journal of virology*  
461 75:1565-1570.

- 462 6. Tyagi M, Rusnati M, Presta M, Giacca M. 2001. Internalization of HIV-1 tat  
463 requires cell surface heparan sulfate proteoglycans. *Journal of Biological*  
464 *Chemistry* 276:3254-3261.
- 465 7. Shukla D, Spear PG. 2001. Herpesviruses and heparan sulfate: an intimate  
466 relationship in aid of viral entry. *The Journal of clinical investigation* 108:503-510.
- 467 8. Shukla D, Liu J, Blaiklock P, Shworak NW, Bai X, Esko JD, Cohen GH,  
468 Eisenberg RJ, Rosenberg RD, Spear PG. 1999. A novel role for 3-O-sulfated  
469 heparan sulfate in herpes simplex virus 1 entry. *Cell* 99:13-22.
- 470 9. Blanchard E, Belouzard S, Goueslain L, Wakita T, Dubuisson J, Wychowski C,  
471 Rouillé Y. 2006. Hepatitis C virus entry depends on clathrin-mediated  
472 endocytosis. *Journal of virology* 80:6964-6972.
- 473 10. Compton T, Feire A. 2007. Early events in human cytomegalovirus infection,  
474 *Human herpesviruses: biology, therapy, and immunoprophylaxis*. Cambridge  
475 University Press.
- 476 11. Ryckman BJ, Jarvis MA, Drummond DD, Nelson JA, Johnson DC. 2006. Human  
477 cytomegalovirus entry into epithelial and endothelial cells depends on genes  
478 UL128 to UL150 and occurs by endocytosis and low-pH fusion. *Journal of*  
479 *virology* 80:710-722.
- 480 12. Podyma-Inoue KA, Moriwaki T, Rajapakshe AR, Terasawa K, Hara-Yokoyama  
481 M. 2016. Characterization of heparan sulfate proteoglycan-positive recycling  
482 endosomes isolated from glioma cells. *Cancer Genomics-Proteomics* 13:443-  
483 452.

- 484 13. Park H, Kim M, Kim H-J, Lee Y, Seo Y, Pham CD, Lee J, Byun SJ, Kwon M-H.  
485 2017. Heparan sulfate proteoglycans (HSPGs) and chondroitin sulfate  
486 proteoglycans (CSPGs) function as endocytic receptors for an internalizing anti-  
487 nucleic acid antibody. *Scientific reports* 7:14373.
- 488 14. Christianson HC, Belting M. 2014. Heparan sulfate proteoglycan as a cell-surface  
489 endocytosis receptor. *Matrix Biology* 35:51-55.
- 490 15. Sarrazin S, Lamanna WC, Esko JD. 2011. Heparan sulfate proteoglycans. *Cold*  
491 *Spring Harbor perspectives in biology* 3:a004952.
- 492 16. Varnum SM, Streblow DN, Monroe ME, Smith P, Auberry KJ, Paša-Tolić L,  
493 Wang D, Camp DG, Rodland K, Wiley S. 2004. Identification of proteins in  
494 human cytomegalovirus (HCMV) particles: the HCMV proteome. *Journal of*  
495 *virology* 78:10960-10966.
- 496 17. Spear PG, Shieh M-T, Herold BC, WuDunn D, Koshy TI. 1992. Heparan sulfate  
497 glycosaminoglycans as primary cell surface receptors for herpes simplex virus, p  
498 341-353, *Heparin and related polysaccharides*. Springer.
- 499 18. Compton T, Nowlin DM, Cooper NR. 1993. Initiation of human cytomegalovirus  
500 infection requires initial interaction with cell surface heparan sulfate. *Virology*  
501 193:834-841.
- 502 19. Laquerre S, Argnani R, Anderson DB, Zucchini S, Manservigi R, Glorioso JC.  
503 1998. Heparan sulfate proteoglycan binding by herpes simplex virus type 1  
504 glycoproteins B and C, which differ in their contributions to virus attachment,  
505 penetration, and cell-to-cell spread. *Journal of virology* 72:6119-6130.



- 506 20. Jacquet A, Haumont M, Chellun D, Massaer M, Tufaro F, Bollen A, Jacobs P.  
507 1998. The varicella zoster virus glycoprotein B (gB) plays a role in virus binding  
508 to cell surface heparan sulfate proteoglycans. *Virus research* 53:197-207.
- 509 21. Wang X, Huong SM, Chiu ML, Raab-Traub N, Huang ES. 2003. Epidermal  
510 growth factor receptor is a cellular receptor for human cytomegalovirus. *Nature*  
511 424:456-61.
- 512 22. Soroceanu L, Akhavan A, Cobbs CS. 2008. Platelet-derived growth factor-alpha  
513 receptor activation is required for human cytomegalovirus infection. *Nature*  
514 455:391-5.
- 515 23. Feire AL, Roy RM, Manley K, Compton T. 2010. The glycoprotein B disintegrin-  
516 like domain binds beta 1 integrin to mediate cytomegalovirus entry. *J Virol*  
517 84:10026-37.
- 518 24. Feire AL, Koss H, Compton T. 2004. Cellular integrins function as entry receptors  
519 for human cytomegalovirus via a highly conserved disintegrin-like domain. *Proc*  
520 *Natl Acad Sci U S A* 101:15470-5.
- 521 25. Boyle KA, Compton T. 1998. Receptor-binding properties of a soluble form of  
522 human cytomegalovirus glycoprotein B. *Journal of virology* 72:1826-1833.
- 523 26. Song BH, Lee GC, Moon MS, Cho YH, Lee CH. 2001. Human cytomegalovirus  
524 binding to heparan sulfate proteoglycans on the cell surface and/or entry  
525 stimulates the expression of human leukocyte antigen class I. *Journal of General*  
526 *Virology* 82:2405-2413.
- 527 27. Esko JD, Selleck SB. 2002. Order out of chaos: assembly of ligand binding sites  
528 in heparan sulfate. *Annual review of biochemistry* 71:435-471.

- 529 28. Multhaupt HA, Couchman JR. 2012. Heparan sulfate biosynthesis: methods for  
530 investigation of the heparanosome. *Journal of Histochemistry & Cytochemistry*  
531 60:908-915.
- 532 29. Tiwari V, Liu J, Valyi-Nagy T, Shukla D. 2011. Anti-heparan sulfate peptides that  
533 block herpes simplex virus infection in vivo. *J Biol Chem* 286:25406-15.
- 534 30. Baldwin J, Maus E, Zanotti B, Volin MV, Tandon R, Shukla D, Tiwari V. 2015. A  
535 role for 3-O-sulfated heparan sulfate in promoting human cytomegalovirus  
536 infection in human iris cells. *J Virol* 89:5185-92.
- 537 31. Tiwari V, Tarbutton MS, Shukla D. 2015. Diversity of heparan sulfate and HSV  
538 entry: basic understanding and treatment strategies. *Molecules* 20:2707-27.
- 539 32. Ali MM, Karasneh GA, Jarding MJ, Tiwari V, Shukla D. 2012. A 3-O-sulfated  
540 heparan sulfate binding peptide preferentially targets herpes simplex virus 2-  
541 infected cells. *J Virol* 86:6434-43.
- 542 33. Wei Z, Lyon M, Gallagher JT. 2005. Distinct substrate specificities of bacterial  
543 heparinases against N-unsubstituted glucosamine residues in heparan sulfate. *J*  
544 *Biol Chem* 280:15742-8.
- 545 34. Kariya Y, Kyogashima M, Suzuki K, Isomura T, Sakamoto T, Horie K, Ishihara M,  
546 Takano R, Kamei K, Hara S. 2000. Preparation of completely 6-O-desulfated  
547 heparin and its ability to enhance activity of basic fibroblast growth factor. *J Biol*  
548 *Chem* 275:25949-58.
- 549 35. Qiu H, Shi S, Yue J, Xin M, Nairn AV, Lin L, Liu X, Li G, Archer-Hartmann SA,  
550 Dela Rosa M, Galizzi M, Wang S, Zhang F, Azadi P, van Kuppevelt TH, Cardoso  
551 WV, Kimata K, Ai X, Moremen KW, Esko JD, Linhardt RJ, Wang L. 2018. A

- 552 mutant-cell library for systematic analysis of heparan sulfate structure-function  
553 relationships. *Nat Methods* 15:889-899.
- 554 36. Zurbach KA, Moghbeli T, Snyder CM. 2014. Resolving the titer of murine  
555 cytomegalovirus by plaque assay using the M2-10B4 cell line and a low viscosity  
556 overlay. *Viol J* 11:71.
- 557 37. Alam SM, Aussedat B, Vohra Y, Meyerhoff RR, Cale EM, Walkowicz WE,  
558 Radakovich NA, Anasti K, Armand L, Parks R, Sutherland L, Searce R, Joyce  
559 MG, Pancera M, Druz A, Georgiev IS, Von Holle T, Eaton A, Fox C, Reed SG,  
560 Louder M, Bailer RT, Morris L, Abdool-Karim SS, Cohen M, Liao HX, Montefiori  
561 DC, Park PK, Fernandez-Tejada A, Wiehe K, Santra S, Kepler TB, Saunders KO,  
562 Sodroski J, Kwong PD, Mascola JR, Bonsignori M, Moody MA, Danishefsky S,  
563 Haynes BF. 2017. Mimicry of an HIV broadly neutralizing antibody epitope with a  
564 synthetic glycopeptide. *Sci Transl Med* 9.
- 565 38. Reddehase MJ, Lemmermann NAW. 2018. Mouse Model of Cytomegalovirus  
566 Disease and Immunotherapy in the Immunocompromised Host: Predictions for  
567 Medical Translation that Survived the "Test of Time". *Viruses* 10.
- 568 39. Brune W, Hengel H, Koszinowski UH. 2001. A mouse model for cytomegalovirus  
569 infection. *Curr Protoc Immunol* Chapter 19:Unit 19 7.
- 570 40. Cekinovic D, Lisnic VJ, Jonjic S. 2014. Rodent models of congenital  
571 cytomegalovirus infection. *Methods Mol Biol* 1119:289-310.
- 572 41. Sauer B. 1987. Functional expression of the cre-lox site-specific recombination  
573 system in the yeast *Saccharomyces cerevisiae*. *Mol Cell Biol* 7:2087-96.

- 574 42. Zhang F, Wen Y, Guo X. 2014. CRISPR/Cas9 for genome editing: progress,  
575 implications and challenges. *Hum Mol Genet* 23:R40-6.
- 576 43. Baldwin J, Maus E, Zanotti B, Volin MV, Tandon R, Shukla D, Tiwari V. 2015. A  
577 role for 3-O-sulfated heparan sulfate in promoting human cytomegalovirus  
578 infection in human iris cells. *Journal of virology* 89:5185-5192.
- 579 44. Oduro JD, Uecker R, Hagemeyer C, Wiebusch L. 2012. Inhibition of human  
580 cytomegalovirus immediate-early gene expression by cyclin A2-dependent  
581 kinase activity. *J Virol* 86:9369-83.
- 582 45. Adamson CS, Nevels MM. 2020. Bright and Early: Inhibiting Human  
583 Cytomegalovirus by Targeting Major Immediate-Early Gene Expression or  
584 Protein Function. *Viruses* 12.
- 585 46. Archer MA, Brechtel TM, Davis LE, Parmar RC, Hasan MH, Tandon R. 2017.  
586 Inhibition of endocytic pathways impacts cytomegalovirus maturation. *Sci Rep*  
587 7:46069.
- 588 47. Dunn W, Chou C, Li H, Hai R, Patterson D, Stolc V, Zhu H, Liu F. 2003.  
589 Functional profiling of a human cytomegalovirus genome. *Proc Natl Acad Sci U S*  
590 *A* 100:14223-8.
- 591 48. Tiwari V, Clement C, Xu D, Valyi-Nagy T, Yue BY, Liu J, Shukla D. 2006. Role  
592 for 3-O-sulfated heparan sulfate as the receptor for herpes simplex virus type 1  
593 entry into primary human corneal fibroblasts. *Journal of virology* 80:8970-8980.
- 594 49. Qiu H, Shi S, Yue J, Xin M, Nairn AV, Lin L, Liu X, Li G, Archer-Hartmann SA,  
595 Dela Rosa M, Galizzi M, Wang S, Zhang F, Azadi P, van Kuppevelt TH, Cardoso  
596 WV, Kimata K, Ai X, Moremen KW, Esko JD, Linhardt RJ, Wang L. 2018. A

- 597 mutant-cell library for systematic analysis of heparan sulfate structure–function  
598 relationships. *Nature Methods* doi:10.1038/s41592-018-0189-6.
- 599 50. Tiwari V, Tarbuton M, Shukla D. 2015. Diversity of heparan sulfate and HSV  
600 entry: basic understanding and treatment strategies. *Molecules* 20:2707-2727.
- 601 51. Tiwari V, O'Donnell C, Copeland RJ, Scarlett T, Liu J, Shukla D. 2007. Soluble 3-  
602 O-sulfated heparan sulfate can trigger herpes simplex virus type 1 entry into  
603 resistant Chinese hamster ovary (CHO-K1) cells. *Journal of General Virology*  
604 88:1075-1079.
- 605 52. O'Donnell CD, Kovacs M, Akhtar J, Valyi-Nagy T, Shukla D. 2010. Expanding the  
606 role of 3-O sulfated heparan sulfate in herpes simplex virus type-1 entry. *Virology*  
607 397:389-398.
- 608 53. Herold BC, Gerber SI, Belval BJ, Siston AM, Shulman N. 1996. Differences in the  
609 susceptibility of herpes simplex virus types 1 and 2 to modified heparin  
610 compounds suggest serotype differences in viral entry. *Journal of virology*  
611 70:3461-3469.
- 612 54. Pomin VH. 2017. Antimicrobial Sulfated Glycans: Structure and Function. *Curr*  
613 *Top Med Chem* 17:319-330.
- 614 55. Hidari KI, Abe T, Suzuki T. 2013. Carbohydrate-related inhibitors of dengue virus  
615 entry. *Viruses* 5:605-18.
- 616 56. Gangji RN, Sankaranarayanan NV, Elste J, Al-Horani RA, Afosah DK, Joshi R,  
617 Tiwari V, Desai UR. 2018. Inhibition of Herpes Simplex Virus-1 Entry into Human  
618 Cells by Nonsaccharide Glycosaminoglycan Mimetics. *ACS Med Chem Lett*  
619 9:797-802.

- 620 57. Majmudar H, Hao M, Sankaranarayanan NV, Zanotti B, Volin MV, Desai UR,  
621 Tiwari V. 2019. A synthetic glycosaminoglycan mimetic blocks HSV-1 infection in  
622 human iris stromal cells. *Antiviral Res* 161:154-162.
- 623 58. Lee E, Pavy M, Young N, Freeman C, Lobigs M. 2006. Antiviral effect of the  
624 heparan sulfate mimetic, PI-88, against dengue and encephalitic flaviviruses.  
625 *Antiviral Res* 69:31-8.
- 626 59. Marks RM, Lu H, Sundaresan R, Toida T, Suzuki A, Imanari T, Hernaiz MJ,  
627 Linhardt RJ. 2001. Probing the interaction of dengue virus envelope protein with  
628 heparin: assessment of glycosaminoglycan-derived inhibitors. *J Med Chem*  
629 44:2178-87.
- 630 60. Modis Y, Ogata S, Clements D, Harrison SC. 2003. A ligand-binding pocket in  
631 the dengue virus envelope glycoprotein. *Proc Natl Acad Sci U S A* 100:6986-91.
- 632 61. Poulain FE, Yost HJ. 2015. Heparan sulfate proteoglycans: a sugar code for  
633 vertebrate development? *Development* 142:3456-67.

## FIGURE LEGENDS

**Figure 1. Structural features of heparan sulfate. (A)** HS is a linear polysaccharide composed of repeating uronic acid [D-glucuronic acid (GlcA) or L-iduronic acid (IdoA)] and D-glucosamine (GlcN) disaccharide subunits. Synthesized chain of HS represents assembly of the tetrasaccharide linker region (GlcA-Gal-Gal- Xyl) at reducing end on serine residues of the protein core followed by the addition of alternating GlcA and GlcNAc residues. The chain extension is also accompanied by a series of modifications, which include 6-O, 3-O sulfations on GlcN and the 2-O sulfation on GlcA. The arrow shows the 3-O position of the GlcN where sulfation is important for herpesvirus binding (15, 50).

**(B)** Heparan sulfate chains are initially synthesized as repeating disaccharide units of N-acetylated glucosamine and glucuronic acid. HS can then be modified by a series of enzymatic reactions, including N-deacetylation and N-sulfation of N-acetylated glucosamine converting it to N-sulfo-glucosamine, C5 epimerization of glucuronic acid to iduronic acid, and O-sulfation at the 2-OH, 6-OH, and 3-OH positions. Among sulfations, first is 2-O-sulfation of iduronic acid and glucuronic acid, followed by 6-O-sulfation of N-acetylated glucosamine and N-sulfo-glucosamine units, and finally 3-O-sulfation of glucosamine residues (52, 61).

Fig. 1A.

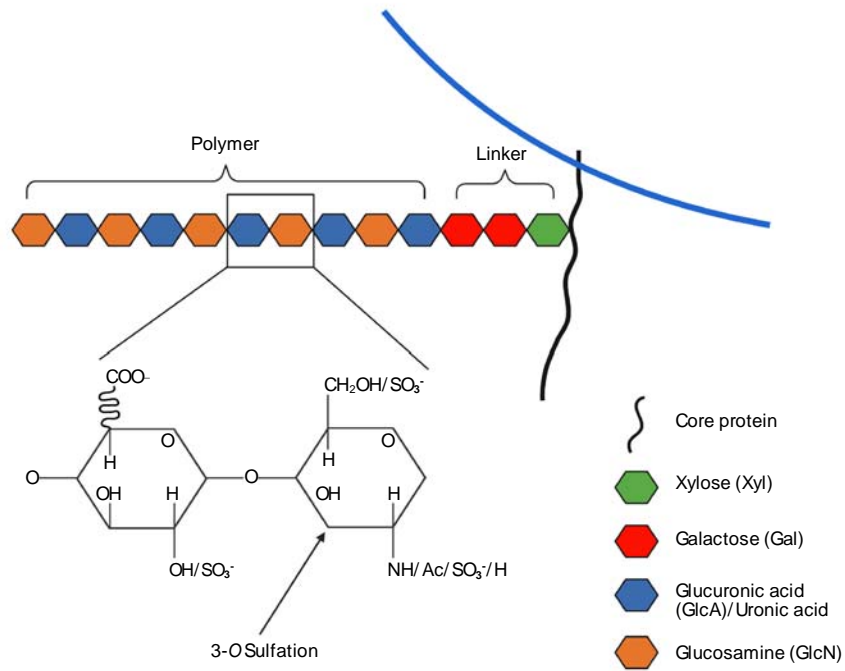

Fig. 1B

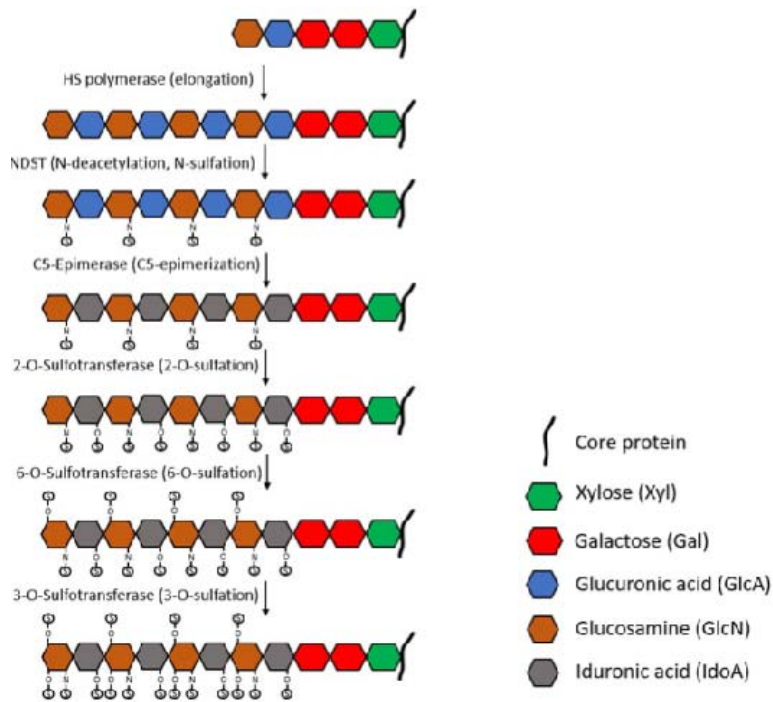



**Figure 2. Binding of purified extracellular CMV virions on a custom designed**

**glycosaminoglycan glycoarray.** Relative fluorescence units (RFU), which are directly proportional to the amount of virus binding, are plotted on the Y-axis in the graph.

Ligand descriptions and chain structures are provided in Table 1. Six replicates for each GAG were used in the assay. NC: Negative control (print buffer), PC1: positive control (Biotinylated Glycan), PC2: human IgG (0.1 mg/ml), PC3: mouse IgG (0.1 mg/ml), PC4: rabbit IgG (0.1 mg/ml), *dp*: degree of polymerization, triangles at the bottom of the graph represent an increasing degree of polymerization of GAGs from left to right. The virus preparation does not contain streptavidin label and thus PC1 serves as a negative rather than a positive control.

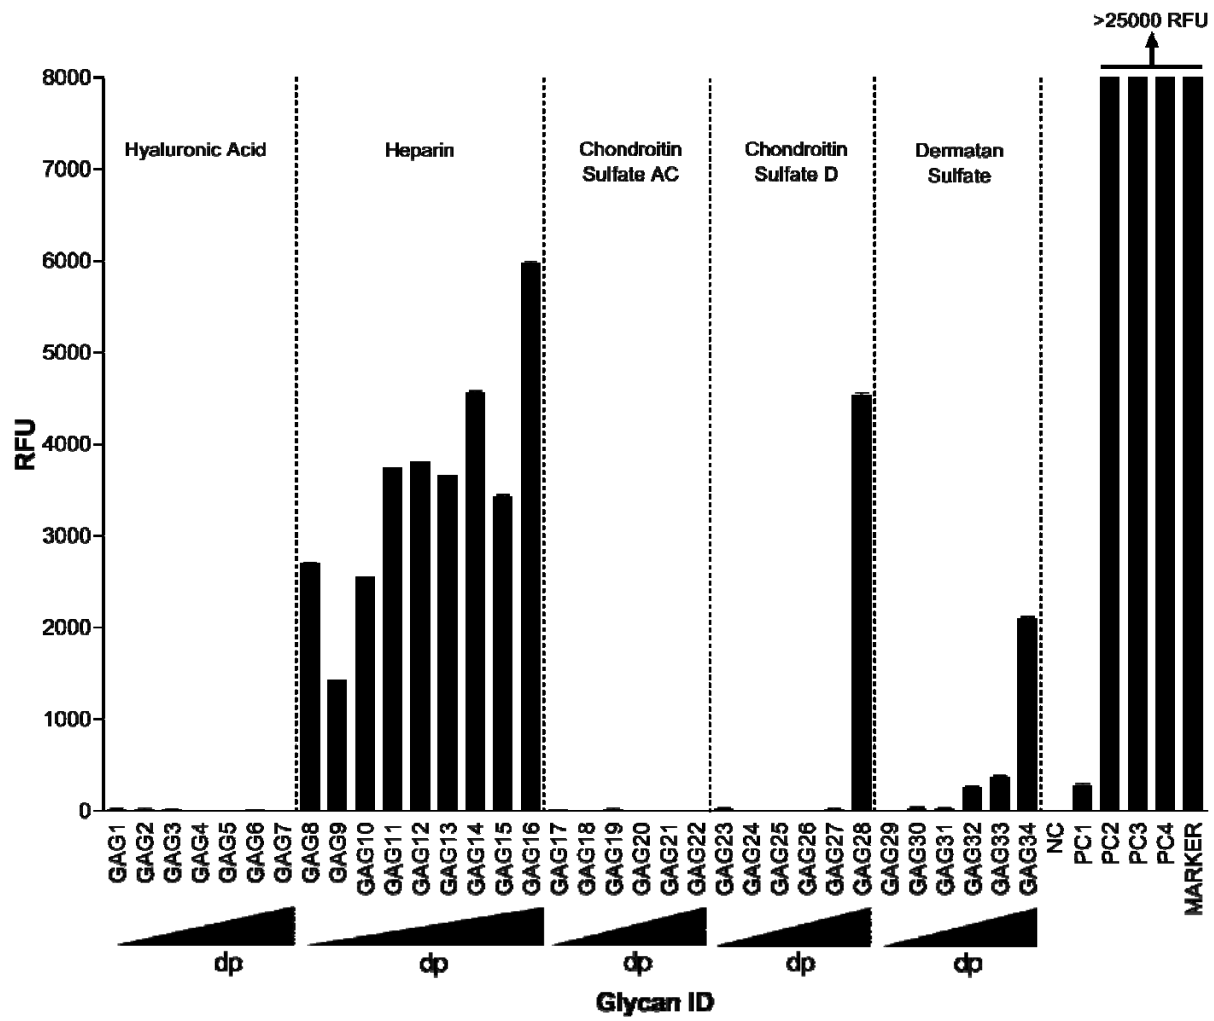

**Figure 3. Binding of purified extracellular CMV on a custom designed heparan sulfate glycoarray.** Relative fluorescence units (RFU), which are directly proportional to the amount of virus binding, are plotted on the Y-axis in the graph. Ligand descriptions and chain structures are provided in Table 2. Six replicates for each ligand were used. NC: negative control (print buffer) PC1: positive control (biotinylated glycan), PC2: human IgG (0.1 mg/ml), PC3: mouse IgG (0.1 mg/ml), PC4: rabbit IgG (0.1 mg/ml). The virus preparation does not contain streptavidin label and thus PC1 serves as a negative rather than a positive control.

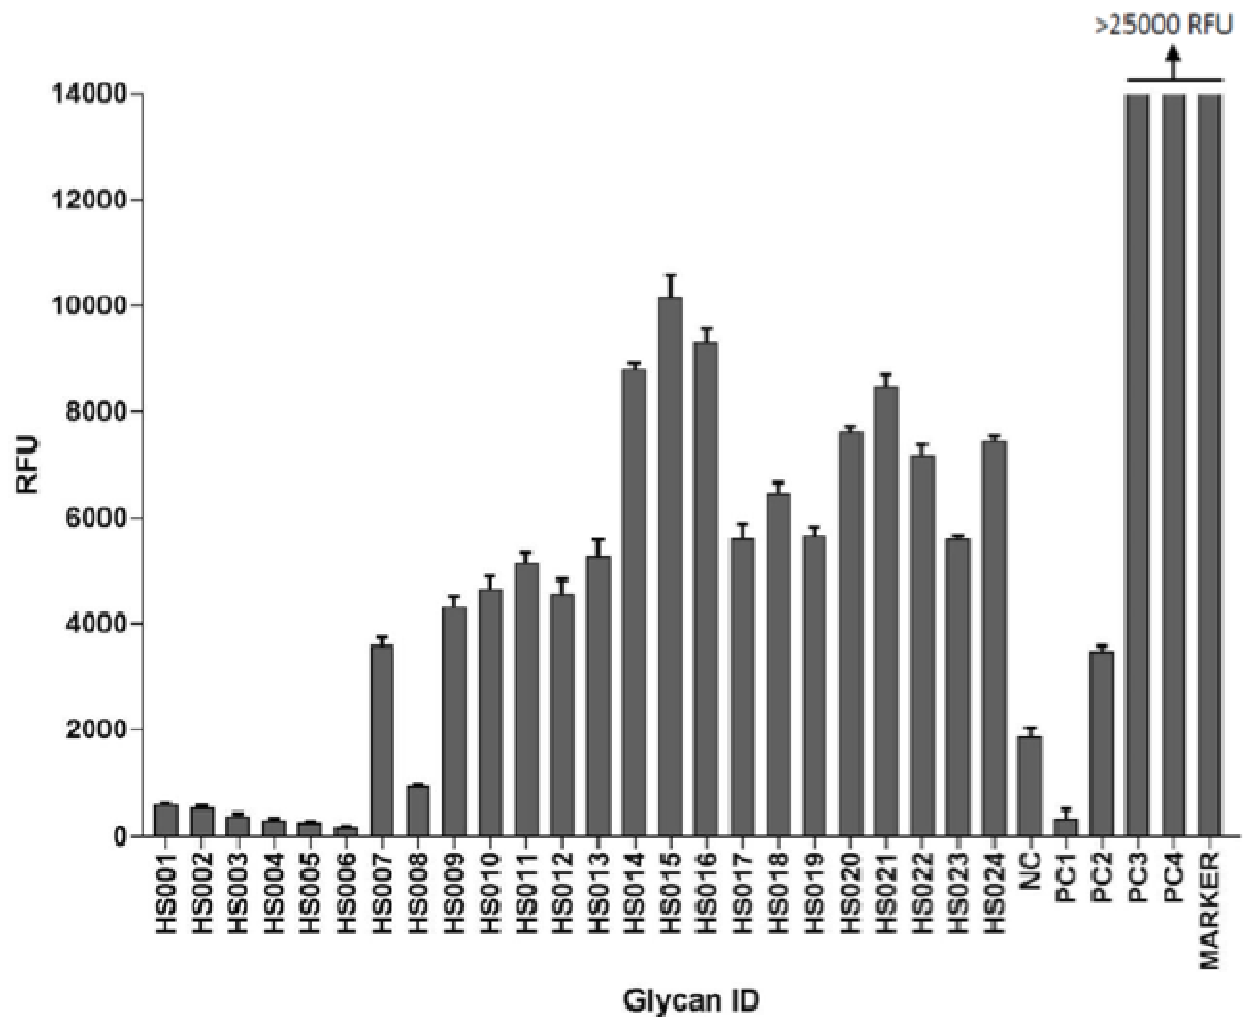

**Figure 4. Inhibition of HCMV growth by glycosaminoglycan derivatives.** Primary human foreskin fibroblasts (HFF) grown in 96 well plate were pretreated for one hour with 10  $\mu$ M of 1) 6-O-desulfated Arixtra, 2) Unmodified Arixtra, 3) Heparin sodium salt from porcine intestinal mucosa (PIHSS), 4) Enoxaparin, or series of heparin oligosaccharide from enoxaparin: 5) *dp2*, 6) *dp4*, 7) *dp6*, 8) *dp8*, 9) *dp10*, 10) *dp12*, 11) *dp14*, 12) *dp16*, 13) *dp18*, 14) *dp20* 15)  $> dp20$  or control (dH<sub>2</sub>O). Cells were infected with GFP tagged HCMV (Towne strain) virus at an MOI of 3.0 in the presence of the test glycosaminoglycans. At 5 days post-infection, cells were fixed and number of foci (GFP) was counted under an epifluorescent microscope. Percent of viral GFP was calculated compared to virus only infected control (100% GFP expression). Results are representative of three independent replicates. Standard error of mean was plotted as error bars.

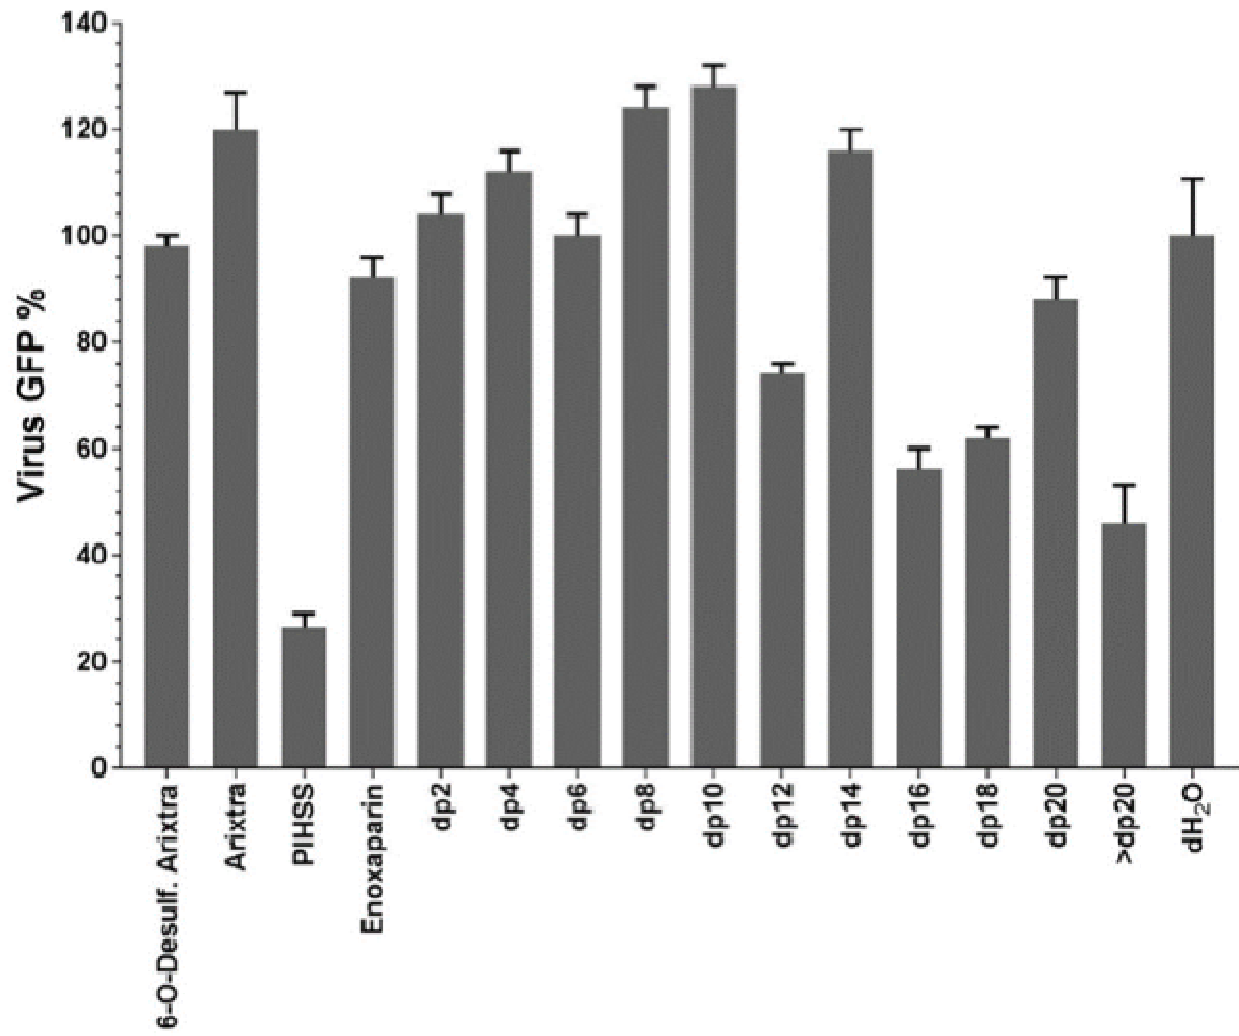

**Figure 5. Effect of glycosaminoglycan derivatives at 10  $\mu$ M concentration on HCMV growth.** (A) Primary human foreskin fibroblasts (HFF) were pretreated for one hour with 10  $\mu$ M of 1) 6-O-desulfated Arixtra, 2) Regular Arixtra, 3) Heparin sodium salt from porcine intestinal mucosa (PIHSS), 4) Enoxaparin, or series of heparin oligosaccharide from enoxaparin: 5) *dp*2, 6) *dp*4, 7) *dp*6, 8) *dp*8, 9) *dp*10, 10) *dp*12, 11) *dp*14, 12) *dp*16, 13) *dp*18, 14) *dp*20 15)  $>$  *dp*20 or control (dH<sub>2</sub>O). Cells were infected with HCMV (Towne strain) virus at an MOI of 3.0 in the presence of test glycosaminoglycans. Cells and media were harvested at 5 days post-infection and titered for HCMV plaque forming units (pfu) on fresh fibroblasts in tissue culture dishes. Individual samples (3 replicates each) were quantified and displayed as total pfu/ml on Y-axis. (B) Virus titer is plotted (Y-axis) against degree of polymerization (X-axis). Data points ahead of the broken line is for a mixture of GAGs (*dp* $>$ 20). Results are representative of three independent replicates. Standard error of mean was plotted as error bars.

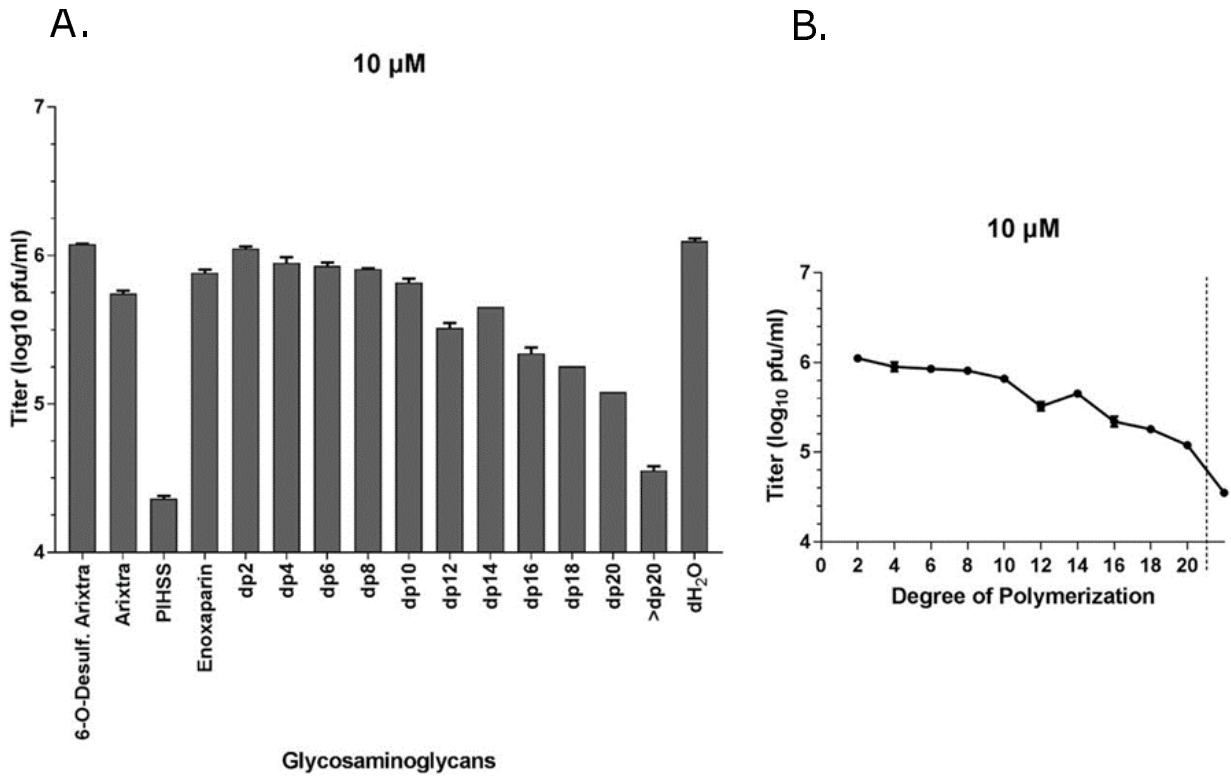

**Figure 6. Effect of glycosaminoglycan derivatives at 0.05 g/L concentration on HCMV growth.** (A) Primary human foreskin fibroblasts (HFF) were pretreated for one hour with 0.05 g/L of 1) 6-O-desulfated Arixtra, 2) Regular Arixtra, 3) Heparin sodium salt from porcine intestinal mucosa (PIHSS), 4) Enoxaparin, or series of heparin oligosaccharide from enoxaparin: 5) *dp*2, 6) *dp*4, 7) *dp*6, 8) *dp*8, 9) *dp*10, 10) *dp*12, 11) *dp*14, 12) *dp*16, 13) *dp*18, 14) *dp*20 15) > *dp*20 or control (dH<sub>2</sub>O). Cells were infected with HCMV (Towne strain) virus at an MOI of 3.0 in the presence of test glycosaminoglycans. Cells and media were harvested at 5 days post-infection and titered for HCMV plaque forming units (pfu) on fresh fibroblasts in tissue culture dishes. Individual samples (3 replicates each) were quantified and displayed as total pfu/ml on Y-axis. (B) Virus titer is plotted (Y-axis) against degree of polymerization (X-axis). Data points ahead of the broken line is for a mixture of GAGs (*dp*>20). Results are representative of three independent replicates. Standard error of mean was plotted as error bars.



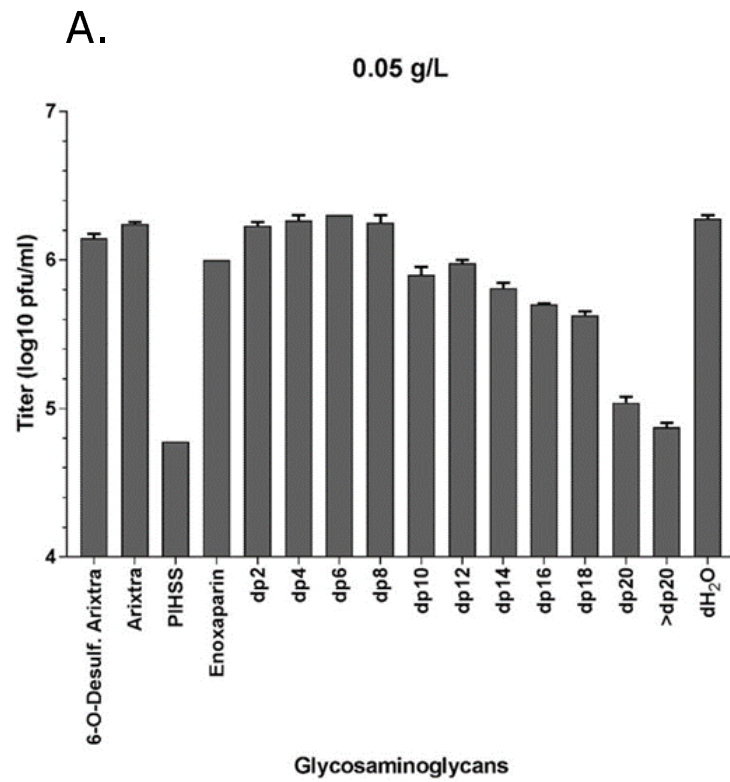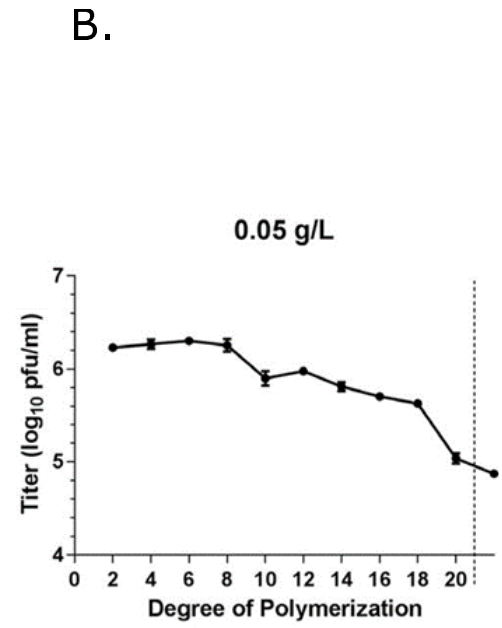

**Figure 7. Effect of GAG treatment on cell viability of HFF cells.** Primary HFF were pretreated for one hour with 10  $\mu$ M of 1) 6-O-desulfated Arixtra, 2) Regular Arixtra, 3) Heparin sodium salt from porcine intestinal mucosa (PIHSS), 4) Enoxaparin, or series of heparin oligosaccharide from enoxaparin: 5) *dp2*, 6) *dp4*, 7) *dp6*, 8) *dp8*, 9) *dp10*, 10) *dp12*, 11) *dp14*, 12) *dp16*, 13) *dp18*, 14) *dp20*, 15)  $> dp20$  or control (dH<sub>2</sub>O). Cells were either mock infected (A) or infected with HCMV (Towne strain) virus at an MOI of 3.0 (B) in the presence of test glycosaminoglycans. Cells were harvested at 5 days post-infection and cell viability was assessed using Trypan Blue exclusion assay. Results are representative of three independent replicates. Standard error of mean was plotted as error bars.

A.

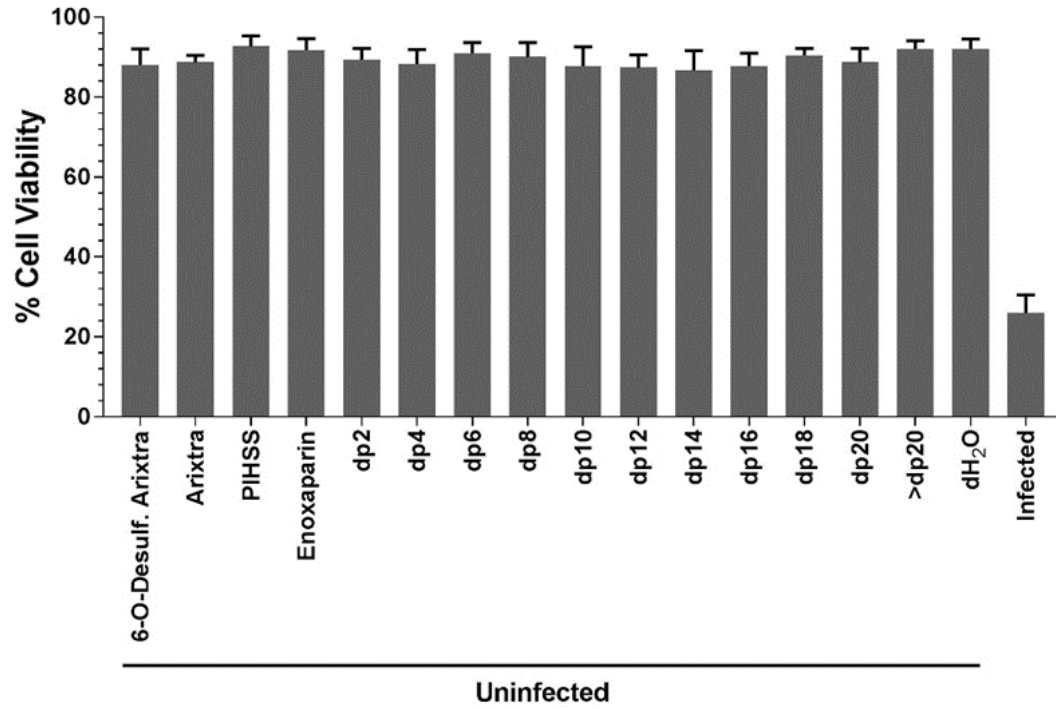

B.

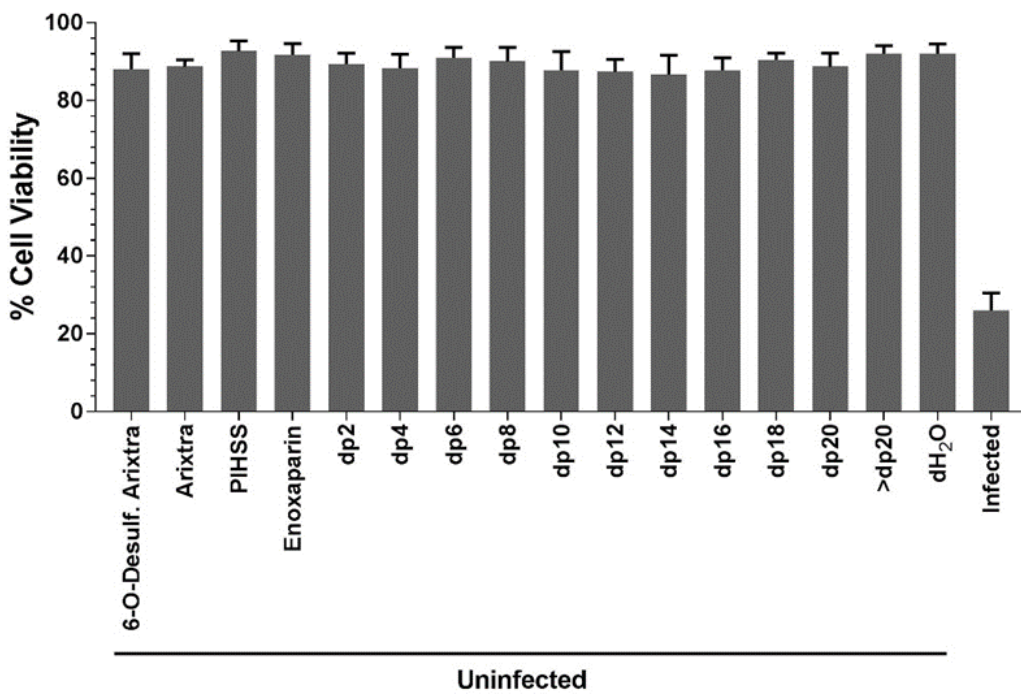

**Figure 8. Mouse CMV replication in sulfotransferase knockout cell lines.** Cells were grown to 90% confluency and infected with wild-type MCMV (strain K181) at low (0.01, A, B) and high (3.0, C, D) MOI. Cells and the medium were harvested at 3- and 5-days post-infection, sonicated to release the virus and diluted for plating on to wild-type MEF in tissue culture dishes in order to enumerate total MCMV pfu/ml. Results are representative of three independent replicates. A student's t-test was conducted in Graphpad Prism comparing the means of different groups. A p-value <0.05 was considered significant. Standard error of mean was plotted as error bars. An asterisk (\*) indicates significant inhibition compared to wild-type. Hs3st1 and Hs3st4: Glucosaminyl 3-O-sulfotransferase 1 and 4, respectively. WT: wild type; KO: knockout.

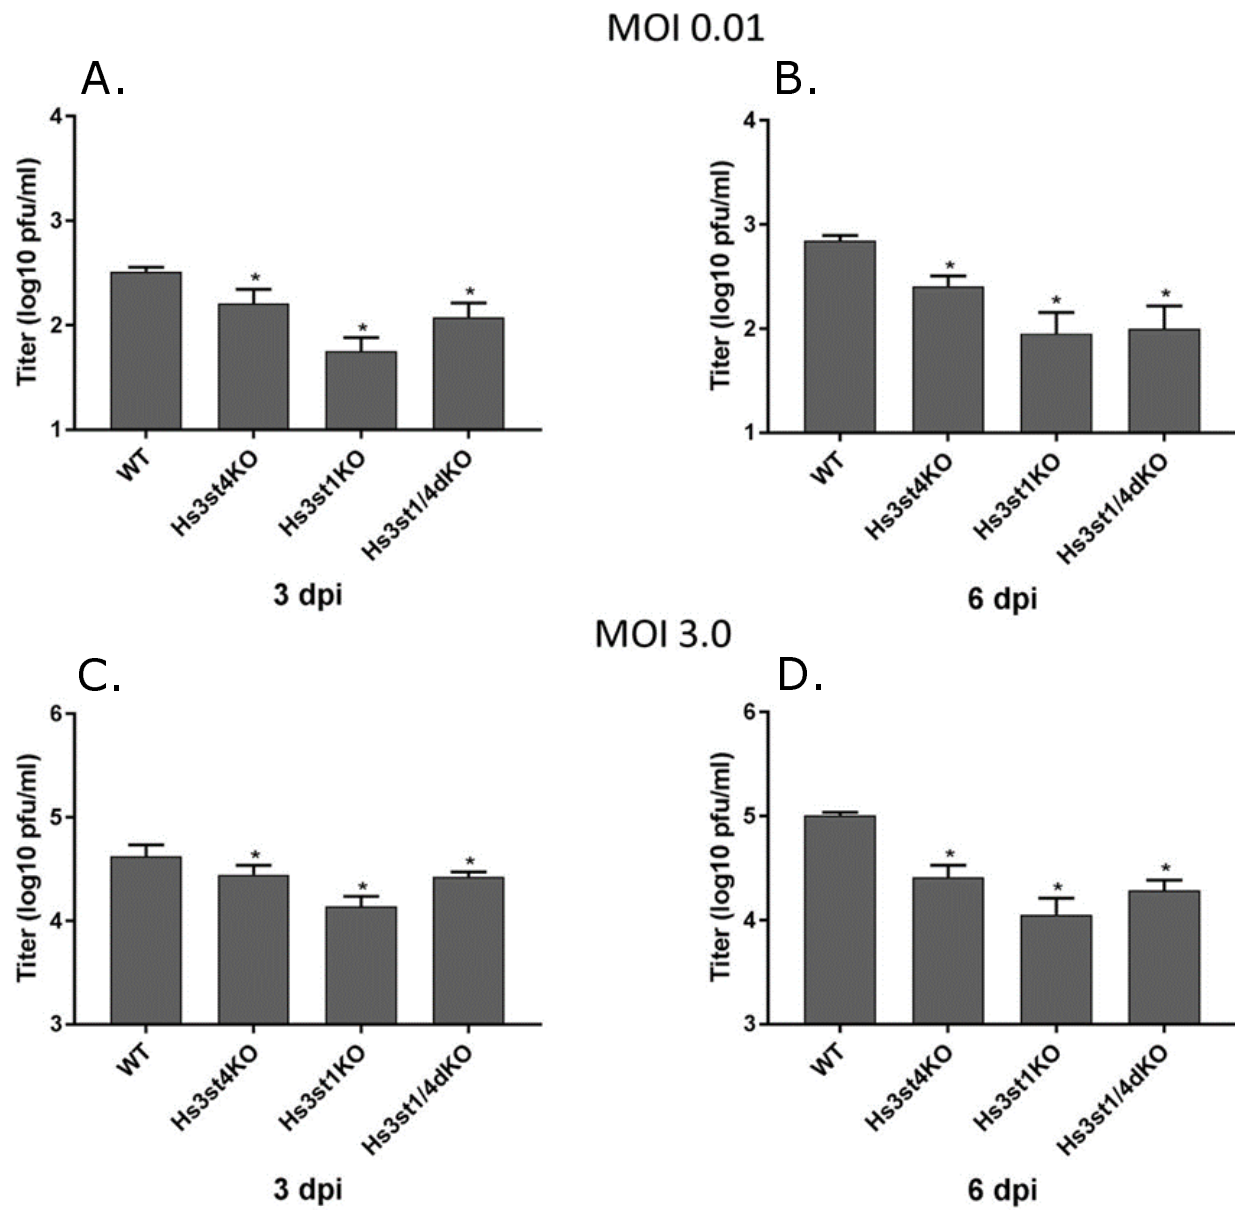

**Figure 9. Mouse CMV entry in sulfotransferase knockout cell lines.** A. Cells were grown to 90% confluency and infected with wild-type MCMV (strain K181) at an MOI of 3.0. Cells were harvested at 2 hours post-infection, and whole cell lysates were loaded on a polyacrylamide gel for blotting. The blots were probed with anti IE1 antibody. Beta-actin was used as a loading control. B. Bands from two independent experiments were quantified by densitometry and means were plotted. Standard error of mean was plotted as error bars. Hs6st1 and Hs6st4: Glucosaminyl 6-O-sulfotransferase 1 and 4, respectively. Hs3st1 and Hs3st4: Glucosaminyl 3-O-sulfotransferase 1 and 4, respectively. WT: wild type; dko: double knockout.

A.

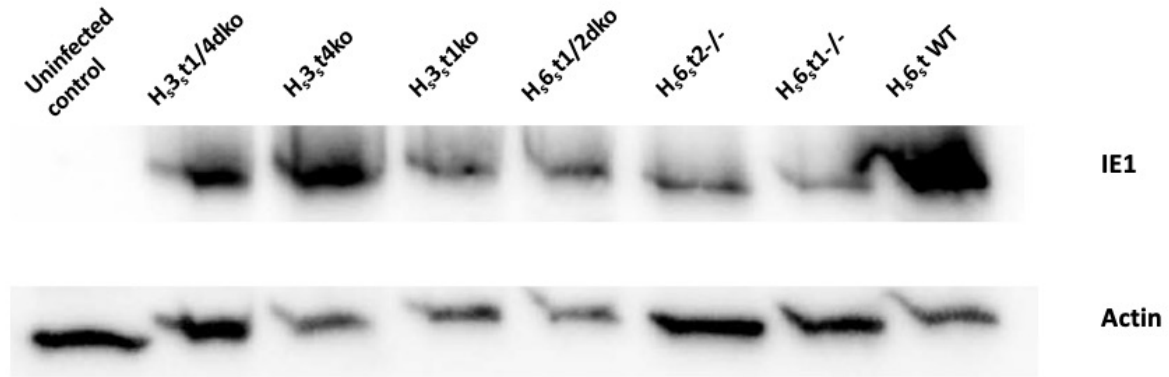

B.

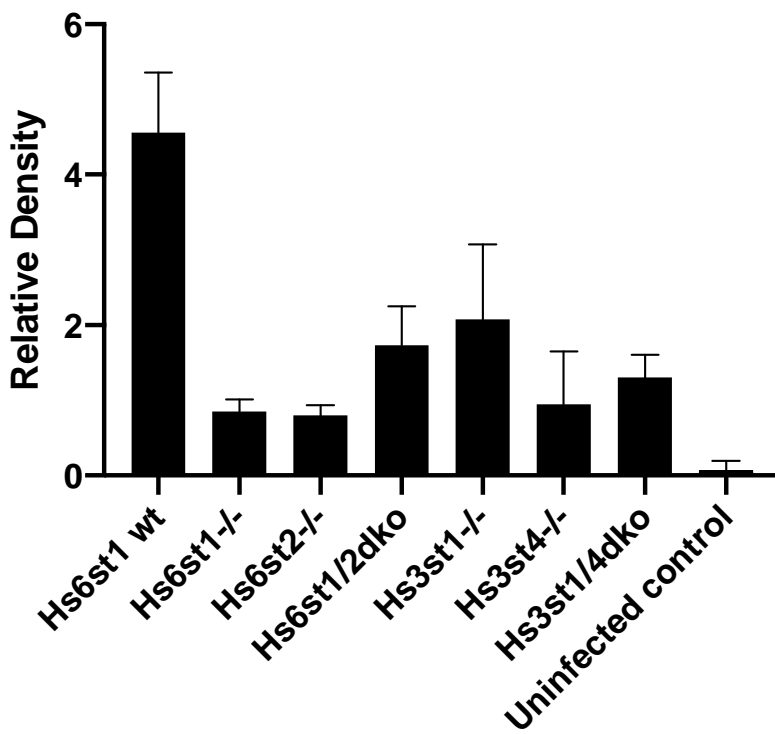

**Figure 10. Effect of anti-3-O-S HS peptide on CMV infectivity in HFF cells.** HFF cells were pre-treated with wild-type HS peptide, anti 3-OS HS peptide for 4 hrs. The mock treated cells were used as a positive control. The cells were infected with  $\beta$ -galactosidase expressing CMV for 9 days.  $\beta$ -Galactosidase assay was performed using X-gal (Sigma). The effect of entry-blocking activity of peptide was examined by counting number of foci. Results are representative of three independent experiments. A student's t-test was conducted in Graphpad Prism comparing the means of each group. A p value <0.05 was considered significant. Standard error of mean was plotted as error bars. Both anti-HS and anti 3-O-S HS showed significant inhibition compared to mock.

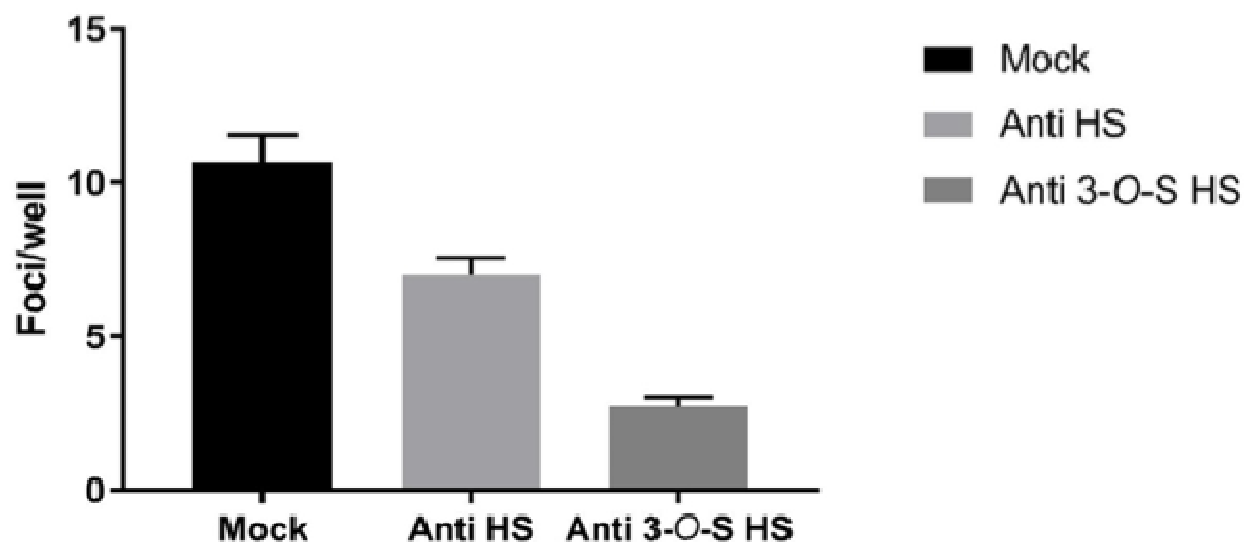

Source: https://www.biorxiv.org/content/biorxiv/early/2021/03/24/590463.full.pdf
